# Supplementary material
Source: Springer Nature journal article supplement (https://www.springermedizin.de/resource/supplementary/12889_2007_1331_MOESM1_ESM.pdf/9502970)

(A)

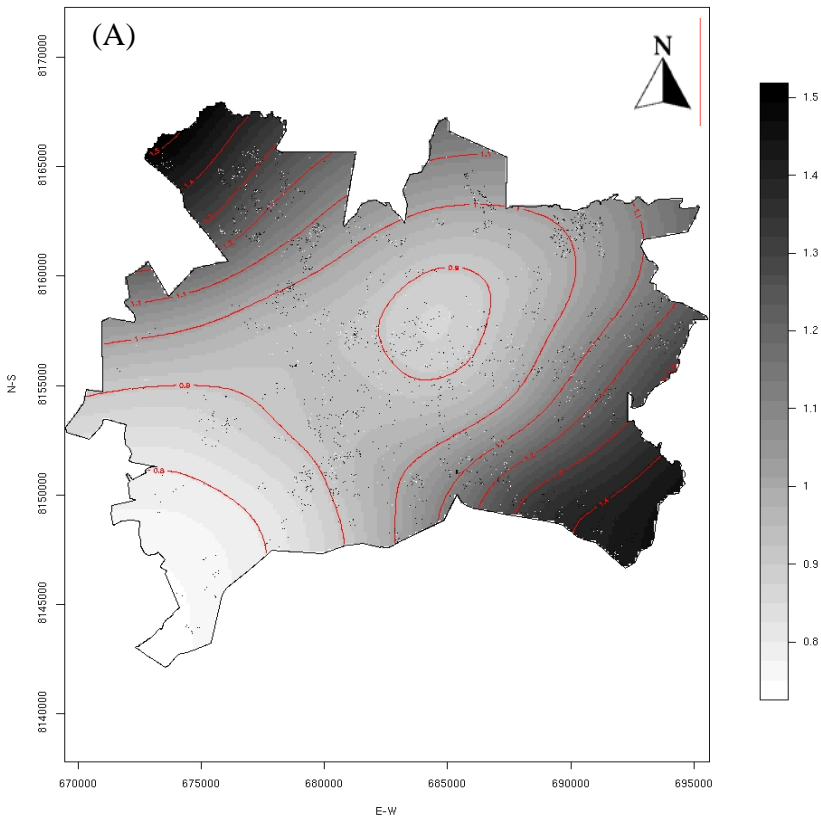

(B)

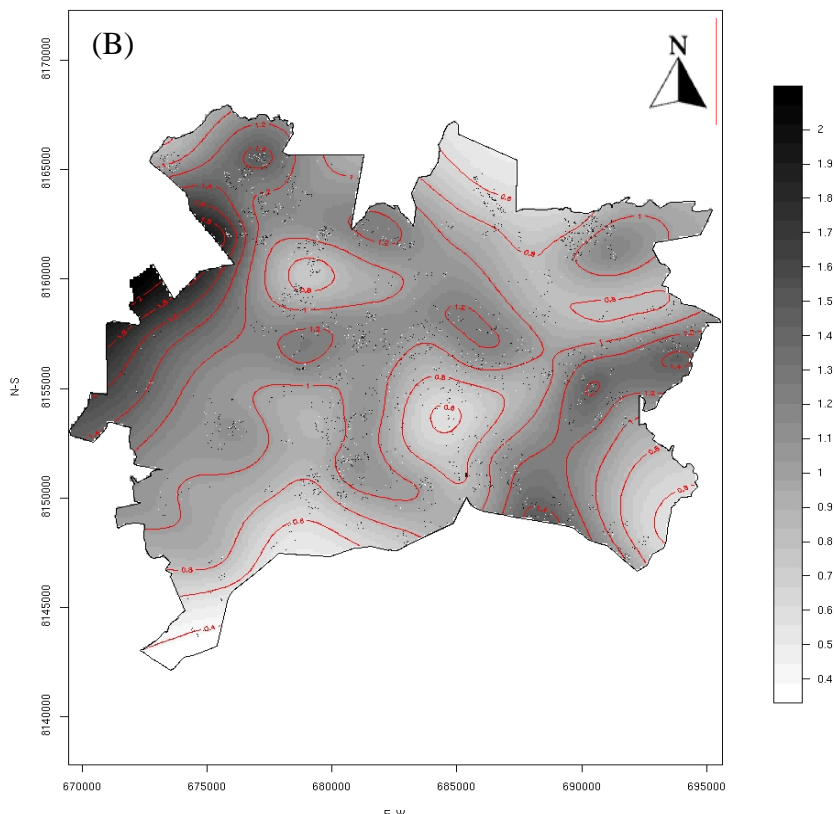

Supplement: MOESM1 [file 9502970]
